# Supplementary material for: Uncoupling FoxO3A mitochondrial and nuclear functions in cancer cells undergoing metabolic stress and chemotherapy
Source: PubMed Central journal article supplement (PMC5833443; doi:10.1038/s41419-018-0336-0), 2018-02-14

**a**

**MPP/MIP Recognition motifs (R-2, R-3, R-10)**

|                   | 80                              | 90 | 100        | 110 |
|-------------------|---------------------------------|----|------------|-----|
| <b>FoxO3A</b>     | GGGGSGTGLGSGLLLEDSARVLPAGGQDPGS |    |            |     |
| <b>R-2 motif</b>  |                                 |    | XRXXX      |     |
| <b>R-3 motif</b>  |                                 |    | XRXXAX     |     |
| <b>R-10 motif</b> |                                 |    | XRXLXGXXXX |     |

**b**

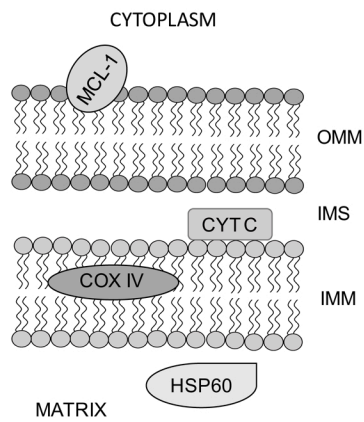

**c**

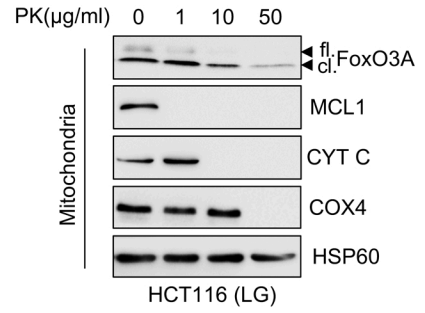

**d**

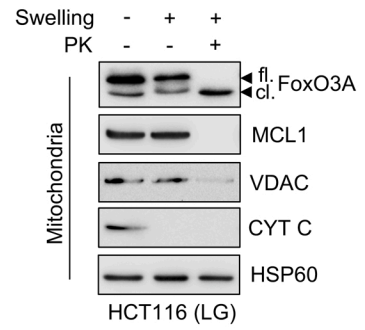

Supplement: 41419_2018_336_MOESM3_ESM.pdf [file 41419_2018_336_MOESM3_ESM.pdf]
