# Supplementary material for: Uncoupling FoxO3A mitochondrial and nuclear functions in cancer cells undergoing metabolic stress and chemotherapy
Source: PubMed Central journal article supplement (PMC5833443; doi:10.1038/s41419-018-0336-0), 2018-02-14
Supplement: 41419_2018_336_MOESM4_ESM.pdf [file 41419_2018_336_MOESM4_ESM.pdf]

Supplementary Figure\_S3 Celestini et al. 2017

```

1           12           30           48
sP|O43524|FOXO3_HUMAN MAEAPASPAPLSPLEVELDPEFEPQSRPRSCTWPLQRPELQASPAKPS--
sP|Q12778|FOXO1_HUMAN MAE-----APQVVEIDPDFEPLRPRSCTWPLRPRPEFSQSNSATSSP
sP|P98177|FOXO4_HUMAN MDPGNENSATEAAAIIDLDPDFEFPQSRPRSCTWPLRPRPEIANQPSEPPEV
sP|A8MYZ6|FOXO6_HUMAN MA-----AKLRAHQVDVDFAPQSRPRSCTWPLPQPDLAGDED-----
*           .           : : : * : * * . * * * * * * * * * * : * : : .

```

```

R-2 |-----|
R-3 |-----|
93 R-10 |-----|
sP|O43524|FOXO3_HUMAN LLEDSARV-LAPGGQDPGSGPA---TAAGG-LSG----GTQALLQPQQPL
sP|Q12778|FOXO1_HUMAN LLEESDFPQAPGSVAAAIAAAAAAAAAATGG-LCGDFQGPEAGCLHPAPPQ
sP|P98177|FOXO4_HUMAN -----LGEK---VHT-----EGRSEPILLPSRLP
sP|A8MYZ6|FOXO6_HUMAN -----GALGAG---VAEGAEDCG----PERRATA---PA

```

Supplementary Figure\_S4 Celestini et al. 2017

a

```

1           12           30           35
Homo sapiens|FOXO3_HUMAN MAEAPASPAPLSP-----LEVELDPEFEPQSRPRSCT---WPL
Pan troglodytes|H2R710_PANTR MAEAPASPAPLSP-----LEVELDPEFEPQSRPRSCT---WPL
Macaca mulatta|I2CWQ1_MACMU MAEAPASPAPLSP-----LEVELDPEFEPQSRPRSCT---WPL
Ovis aries|I0B559_SHEEP MAEAPASPAPLSP-----LEVELDPEFEPQSRPRSCT---WPL
Cricetulus griseus|G3GXX7_CRIGR MAEAPASPVPLSP-----LEVELDPEFEPQSRPRSCT---WPL
Mus musculus|FOXO3_MOUSE MAEAPASPVPLSP-----LEVELDPEFEPQSRPRSCT---WPL
Pteropus Alecto|L5JMP7_PTEAL MAEAPASPAPLSP-----LEVELDPEFEPQSRPRSCT---WPL
Ictalurus punctatus|W5UCF0 ICTPU MAQASCEEKPPPT-----GDVDIDPDFEPQKRPRSCT---WPL
Drosophila melanogaster|FOXO_DROME MMDGYAQEWPRLTHTDNGLAMDQLGGDLPLDVGFEPQTRARSNT---WPC
Caenorhabditis elegans|FOXO_CAEEL MQLEQKSSSLHCSK-----CRNFL-QKFSQDMQAWNCRELDSPL
*           .           : * . : : . . *

```

b

```

R-2 : XRXXS
R-3 : XRXSX
84 R-10 : XRXLXXGXXXXX 116
Homo sapiens|FOXO3_HUMAN -----GSGTLGSGLLLEDSARVLAPGGQDPGSGPATAA
Pan troglodytes|H2R710_PANTR -----GSGTLGSGLLLEDSARVLAPGGQDPGSGPATAA
Macaca mulatta|I2CWQ1_MACMU -----GGGTLGSGLLLEDSARVLAPGGQDPGSGPATAA
Ovis aries|I0B559_SHEEP -----GGGPLGSGLLLEDSARLLAPGGQDPGSGPAPAA
Cricetulus griseus|G3GXX7_CRIGR -----LSSTLGSGLLLEDSARLLAPGGQDLGSGPASAT
Mus musculus|FOXO3_MOUSE -----VSSTLGSGLLLEDSAMLLAPGGQDLGSGPASAA
Pteropus Alecto|L5JMP7_PTEAL -----CGGTLGAGLLLEDSARLLAPGGQDPGSGPAPAA
Ictalurus punctatus|W5UCF0 ICTPU T--S-YIRAKQSHNCDPPGPTLNTTCNDKDS-----DGSRSPPSASQSLAA
Drosophila melanogaster|FOXO_DROME -----SNQQ LAPGDS-----
Caenorhabditis elegans|FOXO_CAEEL TQYSQQFLREKC----SFSPYFHTSLETVDSGRTSLYGSNEQ-C--GQLG
* *

```
