# Supplementary material for: Uncoupling FoxO3A mitochondrial and nuclear functions in cancer cells undergoing metabolic stress and chemotherapy
Source: PubMed Central journal article supplement (PMC5833443; doi:10.1038/s41419-018-0336-0), 2018-02-14

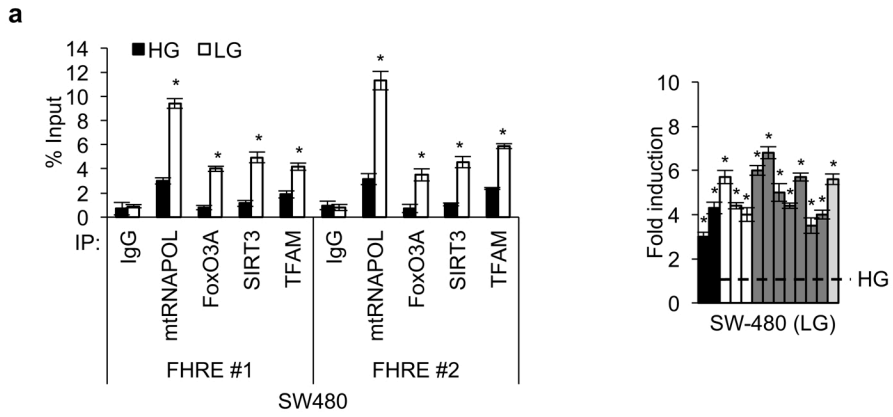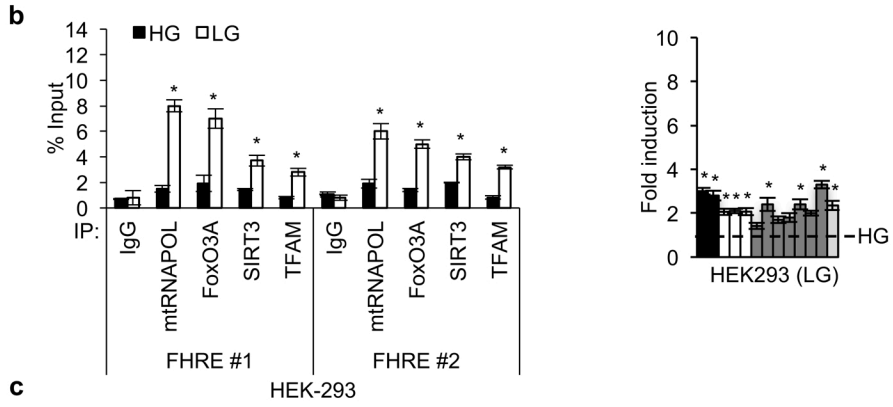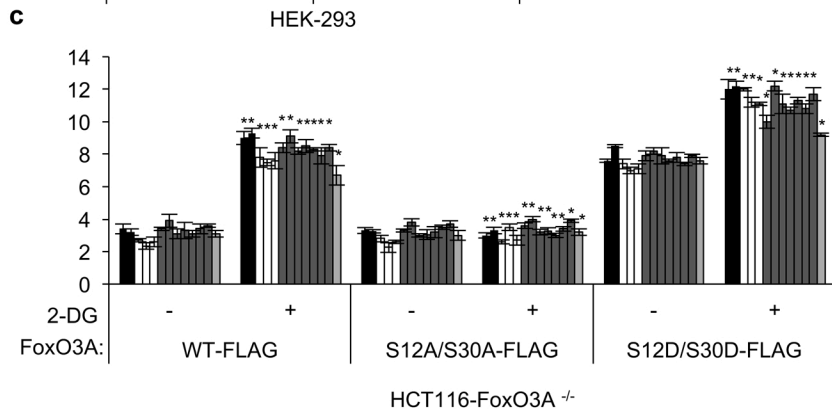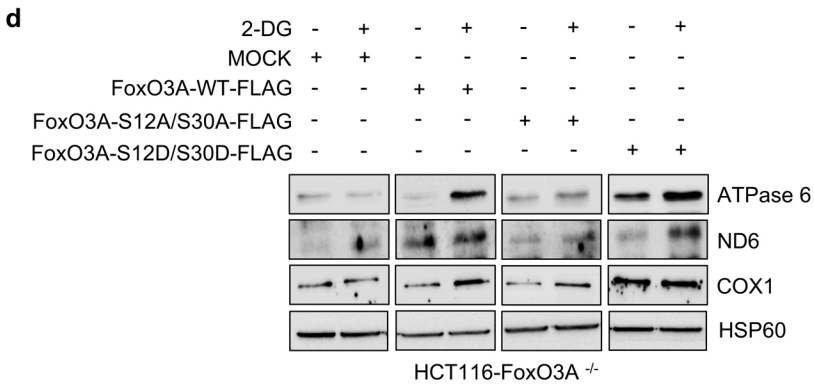

Supplement: 41419_2018_336_MOESM6_ESM.pdf [file 41419_2018_336_MOESM6_ESM.pdf]
